# Supplementary material
Source: publisher figshare collection journal article supplement (https://gsajournals.figshare.com/ndownloader/files/22699337)
Supplement: Supplementary file 1 [file 22699337]

## Sheet: Sheet1
Table S5. List of the highest fold changes in gene copy number between deltamethrin-resistant and -susceptible Anopheles sinensis mosquitoes
Gene ID	length (bp)	UniProtKB/TrEMBL	Gene description	Fold-change	p-value	Adjusted p-value
ASIC004384	55472	A0A084VGQ9	Histidine kinase	1.34025	0	0
ASIC000647	201			-1.24446	9.71387e-09	7.97671e-06
ASIC000911	186			1.22398	1.32247e-07	7.23977e-05
ASIC001059	1769			1.20533	2.92442e-11	4.43342e-08
ASIC001192	903			1.27979	4.2798e-11	6.02473e-08
ASIC001522	727			-1.20677	1.20684e-06	0.000485395
ASIC001554	168	A0A084VBF7	Variant surface glycoprotein 3717	-1.20536	1.38351e-06	0.000534633
ASIC002411	2614			1.24272	3.9968e-15	7.8769e-12
ASIC002830	198	A0A084VD42	Glutaredoxin	1.2391	1.94399e-08	1.47354e-05
ASIC003345	538	A0A084VE24	ATP-dependent RNA helicase DHX29	-1.23547	2.8185e-08	1.85157e-05
ASIC003702	156			1.20699	1.18627e-06	0.000487061
ASIC004260	219	A0A084VGG9	Transient receptor potential cation channel protein painless	1.26792	2.87871e-10	3.33727e-07
ASIC004295	273			1.23132	4.91772e-08	2.93692e-05
ASIC004302	675	A0A084VGK2	tRNA nucleotidyltransferasepolyA-polymerase	1.23306	4.06517e-08	2.5844e-05
ASIC004480	222			-1.20873	9.76104e-07	0.00042749
ASIC004581	183			1.32891	2.22507e-308	1.46173e-304
ASIC004906	255			1.22754	7.9442e-08	4.47326e-05
ASIC005171	312			1.20632	1.24587e-06	0.000491071
ASIC005911	405			1.22119	1.897e-07	0.000101044
ASIC006068	246			-1.26353	5.65536e-10	5.8661e-07
ASIC006698	799	A0A084VMZ4	Glutathione s-transferase E2	-1.35718	2.22507e-308	1.09629e-304
ASIC007491	558			-1.28235	2.86038e-11	4.6977e-08
ASIC007872	624			1.20786	1.05282e-06	0.000441468
ASIC007945	348			1.24911	4.91565e-09	4.21208e-06
ASIC009660	252			1.21804	2.80359e-07	0.000141675
ASIC009575	186	A0A084VVK5	Peptidase M50	-1.23249	4.3741e-08	2.6939e-05
ASIC009754	195			-1.20538	1.38351e-06	0.000524352
ASIC009866	333			-1.44161	2.22507e-308	8.77035e-305
ASIC010381	1158			1.21137	6.88939e-07	0.000315758
ASIC010815	171			-1.25428	2.20171e-09	1.97233e-06
ASIC011293	267			1.32748	2.22507e-308	7.30863e-305
ASIC011651	249	A0A084W0R5	Thiamine biosynthesis adenylyltransferase ThiF	1.22101	1.92336e-07	9.97516e-05
ASIC012426	371	A0A084W2V3	Glycosyl transferase family 2	1.20417	1.58509e-06	0.000589414
ASIC012557	222			-1.21044	7.65625e-07	0.00034293
ASIC012876	25181	A0A084W411	AraC family transcriptional regulator	-1.29411	0	0
ASIC013265	370	A0A084W524	Virulence protein	-1.30773	3.27396e-13	5.86575e-10
ASIC013394	314	A0A084W5G3	Protein white-like protein	-1.26433	5.13976e-10	5.62747e-07
ASIC013899	334			1.21464	4.31492e-07	0.000202472
ASIC013956	219	A0A084W6Z6	UvrD/REP helicase	1.20169	2.17312e-06	0.000778687
ASIC014185	707	A0A084W7I9	Peptidase C1A papain	-1.20038	2.53534e-06	0.000892258
ASIC015099	375			-1.20819	1.01999e-06	0.000437001
ASIC015344	228	A0A084WAR7	Alcohol dehydrogenase GroES domain protein	-1.23769	2.22751e-08	1.62591e-05
ASIC015357	959	A0A084WAS8	Dwil\GK21198-PA-like protein	1.27029	2.08977e-10	2.57407e-07
ASIC015407	186	A0A084WB65	Glycoside hydrolase family 38	1.25647	1.68654e-09	1.58278e-06
ASIC015682	177			-1.32782	2.22507e-308	6.26454e-305
ASIC016752	276			1.21632	3.42717e-07	0.000164738
ASIC017541	2474			1.34077	2.22507e-308	5.48147e-305
ASIC018411	233			1.21724	3.08817e-07	0.000152154
ASIC019132	243			1.20201	2.1172e-06	0.000772701
ASIC019484	438	A0A084WLX5	F-box/LRR-repeat protein 4	1.23592	2.67539e-08	1.81816e-05
ASIC019938	270			1.2745	1.04388e-10	1.37152e-07
ASIC020238	252			1.22804	7.57103e-08	4.38852e-05
ASIC020279	183			-1.2375	2.24974e-08	1.58349e-05
ASIC020925	270	A0A084WR26	Protein PRRC2A isoform X1	-1.44	2.22507e-308	4.87242e-305
ASIC021089	438			-1.26154	7.36396e-10	7.25645e-07
ASIC021341	320	A0A084WS47	ATP-dependent DNA helicase RecQ	1.24318	1.13402e-08	8.93968e-06
